# Supplementary material
Source: HighWire-hosted journal article supplement (https://ijgc.bmj.com/highwire/filestream/18739/field_highwire_adjunct_files/0/ijgc-2020-002217supp001_data_supplement.pdf)
Supplement: ijgc-2020-002217supp001_data_supplement.pdf [file ijgc-2020-002217supp001_data_supplement.pdf]

| Patient Number | Age at Diagnosis | Tumor Size (cm) | Histology  | Lympho-vascular Space Invasion | FIGO Stage | Chemotherapy | Disease Status                                       |
|----------------|------------------|-----------------|------------|--------------------------------|------------|--------------|------------------------------------------------------|
| 1              | 86               | 3.5             | Clear cell | No                             | IA         | No           | Peritoneal recurrence, died from disease             |
| 2              | 60               | 6.3             | Mixed      | No                             | IA         | No           | Vaginal recurrence, alive after salvage              |
| 3              | 59               | 6.5             | Clear cell | No                             | IA         | No           | Peritoneal recurrence, died from disease             |
| 4              | 68               | 2.8             | Serous     | No                             | IA         | No           | Diffuse metastases, alive with disease               |
| 5              | 68               | 3.7             | Serous     | No                             | IA         | No           | Diffuse metastases, alive with disease               |
| 6              | 71               | 2.7             | Serous     | No                             | IA         | No           | No evidence of disease, alive                        |
| 7              | 60               | 3.0             | Clear cell | No                             | IA         | Yes          | Mediastinal failure, died from disease               |
| 8              | 78               | 5.0             | Clear cell | No                             | IA         | Yes          | No evidence of disease, lost to follow up at ~66 mo. |
| 9              | 74               | 4.5             | Serous     | No                             | IA         | Yes          | No evidence of disease, lost to follow up at ~71 mo. |
| 10             | 53               | 5.5             | Serous     | Yes                            | IA         | Yes          | No evidence of disease, alive                        |
| 11             | 71               | 1.2             | Serous     | No                             | IA         | Yes          | No evidence of disease, alive                        |
| 12             | 51               | 3.5             | Serous     | No                             | IA         | Yes          | No evidence of disease, alive                        |
| 13             | 70               | 6.0             | Clear cell | No                             | IA         | Yes          | No evidence of disease, alive                        |
| 14             | 60               | 1.5             | Clear cell | No                             | IA         | Yes          | No evidence of disease, alive                        |
| 15             | 71               | 2.0             | Clear cell | No                             | IA         | Yes          | No evidence of disease, alive                        |
| 16             | 65               | 1.8             | Serous     | No                             | IA         | Yes          | No evidence of disease, alive                        |
| 17             | 59               | 4.0             | Serous     | No                             | IA         | Yes          | No evidence of disease, alive                        |
| 18             | 84               | 5.3             | Serous     | No                             | IA         | Yes          | No evidence of disease, alive                        |
| 19             | 84               | 5.5             | Serous     | No                             | IA         | Yes          | No evidence of disease, alive                        |
| 20             | 59               | 4.8             | Serous     | No                             | IA         | Yes          | No evidence of disease, alive                        |
| 21             | 80               | 2.9             | Serous     | Yes                            | IA         | Yes          | No evidence of disease, alive                        |
| 22             | 58               | 5.5             | Serous     | No                             | IA         | Yes          | No evidence of disease, alive                        |
| 23             | 65               | 3.5             | Serous     | No                             | IA         | Yes          | No evidence of disease, alive                        |
| 24             | 65               | 1.0             | Serous     | No                             | IA         | Yes          | No evidence of disease, alive                        |
| 25             | 62               | 3.8             | Serous     | Yes                            | IB         | Yes          | No evidence of disease, alive                        |
| 26             | 68               | 5.8             | Serous     | No                             | IB         | Yes          | No evidence of disease, alive                        |
| MEDIAN         | 66.5             | 3.75            |            |                                |            |              |                                                      |
| IQR            | 59.8 – 71.8      | 2.8 – 5.5       |            |                                |            |              |                                                      |

Supplemental Material 1. Positive or Suspicious Cytology Cohort

| <b>Cohort</b>                 | <b>Non-Chemotherapy</b> | <b>Chemotherapy</b> | <b>p-value</b>  |
|-------------------------------|-------------------------|---------------------|-----------------|
| <b>Characteristic</b>         | <b>Value (%)</b>        | <b>Value (%)</b>    |                 |
| <i>No. of patients</i>        | 106                     | 76                  |                 |
| Age (y)                       |                         |                     |                 |
| Median                        | 67.8                    | 66.1                | 0.47            |
| Range                         | 44.0 – 87.9             | 40.8 – 84.1         |                 |
| Histology                     |                         |                     |                 |
| Papillary Serous (S)          | 60 (56.6)               | 54 (71.1)           | 0.14            |
| Clear Cell (CC)               | 24 (22.6)               | 11 (14.5)           |                 |
| Mixed (M)                     | 22 (20.8)               | 11 (14.5)           |                 |
| FIGO 2009 stage               |                         |                     |                 |
| IA                            | 99 (93.4)               | 61 (80.3)           | <b>0.01</b>     |
| IB                            | 7 (6.6)                 | 15 (19.7)           |                 |
| Omentum Explored              |                         |                     |                 |
| Yes                           | 79 (74.5)               | 62 (81.6)           | 0.26            |
| No                            | 27 (25.5)               | 14 (18.4)           |                 |
| Cytology Obtained             |                         |                     |                 |
| Yes                           | 92 (86.8)               | 68 (89.5)           | 0.58            |
| No                            | 14 (13.2)               | 8 (10.5)            |                 |
| Size (cm)                     |                         |                     |                 |
| Median                        | 2.9                     | 3.6                 | <b>0.01</b>     |
| IQR                           | 1.9 – 3.9               | 2.4 – 4.7           |                 |
| Missing                       | 6 (5.7)                 | 1 (1.3)             |                 |
| Lymphovascular space invasion |                         |                     |                 |
| Positive                      | 14 (13.2)               | 19 (25.0)           | 0.07            |
| Negative                      | 77 (72.6)               | 51 (67.1)           |                 |
| Missing                       | 15 (14.2)               | 6 (7.9)             |                 |
| Cytology                      |                         |                     |                 |
| Positive/Suspicious           | 6 (5.7)                 | 20 (26.3)           | <b>&lt;0.01</b> |
| Negative                      | 86 (81.1)               | 48 (63.2)           |                 |
| Missing                       | 14 (13.2)               | 8 (10.5)            |                 |

**Supplementary Material 2: Baseline Patient, Treatment, and Pathologic Variables between Non-Chemotherapy and Chemotherapy Cohorts.**
